# Supplementary material for: New endeavours involving the cooperative behaviour of TMAO and urea towards the globular state of poly(N-isopropylacrylamide)
Source: Royal Society of Chemistry journal article supplement (doi:10.1039/c7ra05120d), 2017-01-01
Supplement: c7ra05120d1.pdf [file c7ra05120d1.pdf]

**New endeavour to the cooperative behaviour of TMAO and urea towards the globular state of Poly(N-isopropylacrylamide)**

Payal Narang, and Pannuru Venkatesu\*

Department of Chemistry, University of Delhi, Delhi – 110007, India

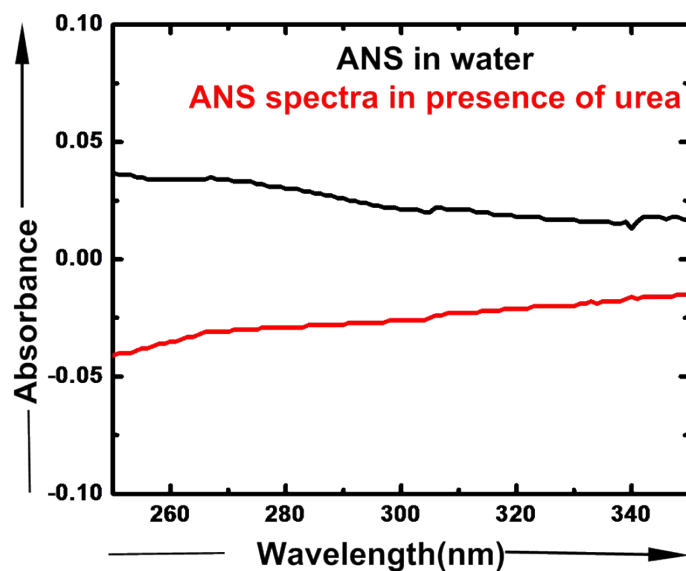

**Fig. 1S** The absorbance spectra of ANS in (a) water (black), (b) urea (red).

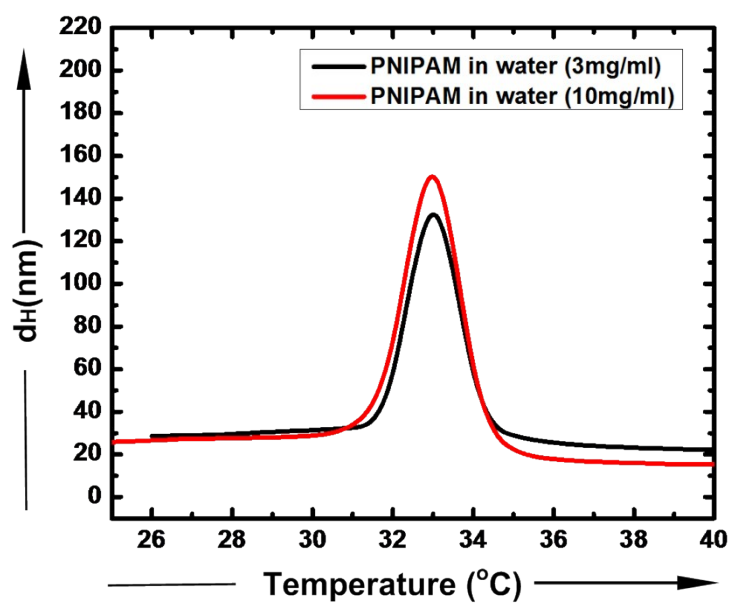

**Fig. 2S** The hydrodynamic diameter of PNIPAM in aqueous solution (a) 3 mg/ml and (b) 10 mg/ml.
